# Supplementary material for: Deterioration of an Etruscan tomb by bacteria from the order Rhizobiales
Source: PubMed Central journal article supplement — Sci Rep. 2014 Jan 9;4:3610. doi: 10.1038/srep03610 (PMC3885883; doi:10.1038/srep03610), 2014-01-09
Supplement: srep03610-s1.pdf [file srep03610-s1.pdf]

## Supplementary Information

### Deterioration of an Etruscan tomb by bacteria from the order *Rhizobiales*

M. Diaz-Herraiz, V. Jurado, S. Cuezva, L. Laiz, P. Pallecchi, P. Tiano, S. Sanchez-Moral & C. Saiz-Jimenez\*

\*To whom correspondence should be addressed. E-mail: saiz@irnase.csic.es (C.S.J.)

This PDF file includes

Rarefaction curves  
Tables S1-S5

## Rarefaction curves

Rarefaction curves (Fig. S1) indicated that the full extent of diversity was not reached, suggesting that a greater diversity of bacteria was present in the samples. Due to the sampling restrictions imposed by the protection of cultural heritage site guidelines, the number and size of samples was limited and a deep coverage of the bacterial communities in the samples from this historical site was not possible.

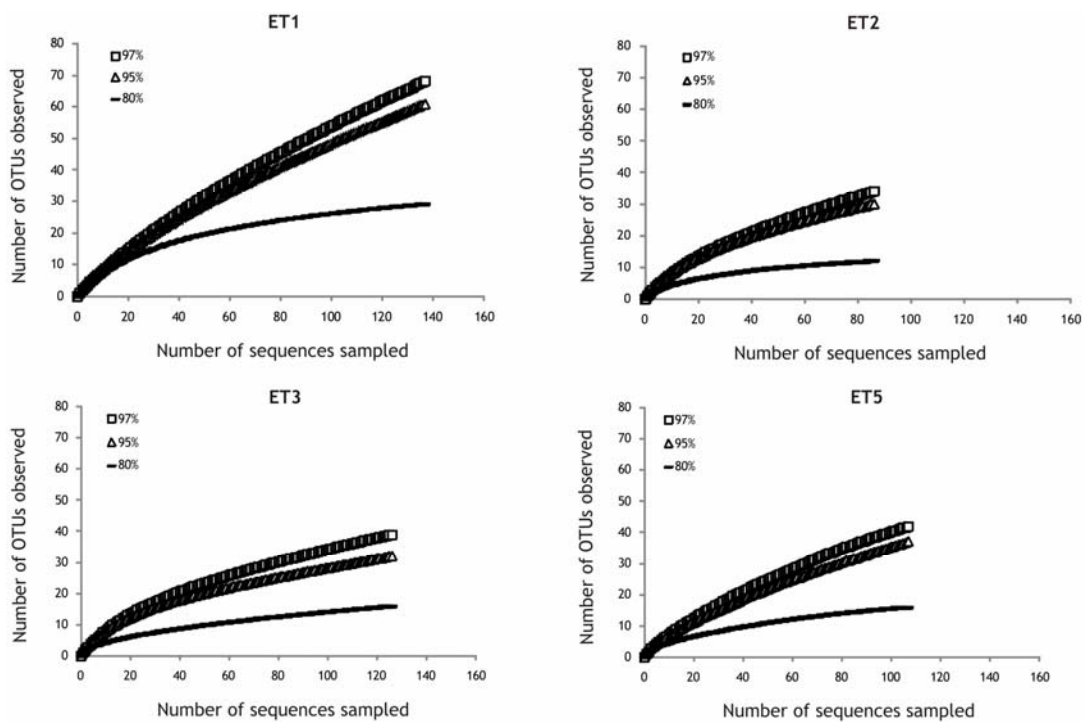

Figure S1. Rarefaction curves of 16S rDNA gene sequences of the bacteria clones from *Tomba del Colle*.

Table S1. Phylogenetic affiliations of the 16S rRNA sequences obtained from the bacteria in the ET1 sample

| Representative clone (accession number) | No. of clones | Similarity (%) | Nearest published relative                               | Source                                          | Similarity (%) | Eztaxon affiliation (accession number)                        |
|-----------------------------------------|---------------|----------------|----------------------------------------------------------|-------------------------------------------------|----------------|---------------------------------------------------------------|
| <b>Acidobacteria</b>                    |               |                |                                                          |                                                 |                |                                                               |
| HG379790                                | 1             | 97             | <i>Acidobacteria</i> bacterium (GU187029)                | Surface soil                                    | 84             | <i>Terriglobus saanensis</i> (CP002467)                       |
| HG379791                                | 2             | 98             | Uncultured <i>Acidobacteria</i> bacterium (HQ729805)     | Grassland soil                                  | 82             | <i>Acanthopleuribacter pedis</i> (AB303221)                   |
| HG379792                                | 1             | 91             | Uncultured <i>Acidobacteria</i> bacterium (AM934751)     | Contaminated soil                               | 84             | <i>Acidicapsa borealis</i> (FR774763)                         |
| HG379793                                | 4             | 99             | Uncultured <i>Acidobacteria</i> bacterium (GQ120659)     | Mine tailings                                   | 84             | <i>Candidatus</i> Chloracidobacterium thermophilus (CP002514) |
| HG379794                                | 3             | 99             | Uncultured <i>Acidobacteria</i> bacterium (JN037860)     | Saline-alkaline soil                            | 85             | <i>Candidatus</i> Chloracidobacterium thermophilus (CP002514) |
| HG379795                                | 1             | 98             | Uncultured <i>Acidobacteria</i> bacterium (HM062376)     | Agricultural soil                               | 80             | <i>Candidatus</i> Chloracidobacterium thermophilus (CP002514) |
| HG379796                                | 1             | 95             | Uncultured <i>Acidobacteria</i> bacterium (JQ957800)     | Rhizosphere soil                                | 80             | <i>Candidatus</i> Chloracidobacterium thermophilus (CP002514) |
| HG379797                                | 1             | 96             | Uncultured <i>Acidobacteria</i> bacterium (HF584585)     | White spots from Etruscan tombs mural paintings | 85             | <i>Candidatus</i> Chloracidobacterium thermophilus (CP002514) |
| HG379798                                | 1             | 99             | Uncultured <i>Acidobacteria</i> bacterium (HQ597108)     | Grassland soil                                  | 83             | <i>Geothrix fermentans</i> (U41563)                           |
| HG379799                                | 1             | 97             | Uncultured <i>Acidobacteriaceae</i> bacterium (AM935189) | Hydrocarbon-contaminated soil                   | 87             | <i>Solibacter usitatus</i> (CP000473)                         |
| HG379800                                | 2             | 91             | Uncultured bacterium (JN850206)                          | Lava tube wall                                  | 82             | <i>Acidicapsa ligni</i> (EU780204)                            |
| HG379801                                | 4             | 97             | Uncultured bacterium (JF266297)                          | White microbial mat lava tube walls             | 83             | <i>Acidicapsa ligni</i> (EU780204)                            |
| HG379802                                | 1             | 95             | Uncultured bacterium (HM186317)                          | Saturated zone of the Hanford Site              | 88             | <i>Acidobacterium capsulatum</i> (AB561884)                   |
| HG379803                                | 3             | 97             | Uncultured bacterium (JF266297)                          | White microbial mat lava tube walls             | 85             | <i>Candidatus</i> Koribacter versatilis (CP000360)            |
| <b>Actinobacteria</b>                   |               |                |                                                          |                                                 |                |                                                               |
| HG379804                                | 1             | 90             | Uncultured actinobacterium (HF584587)                    | White spots from Etruscan tombs mural paintings | 87             | <i>Actinoallomurus spadix</i> (AF163120)                      |
| HG379805                                | 1             | 97             | Uncultured actinobacterium (HF584505)                    | White spots from Etruscan tombs mural paintings | 91             | <i>Crosiella cryophila</i> (AF114806)                         |
| HG379806                                | 1             | 85             | Uncultured actinobacterium (HF584587)                    | White spots from Etruscan tombs mural paintings | 82             | <i>Crossiella cryophila</i> (A114806)                         |
| HG379807                                | 1             | 97             | Uncultured actinobacterium (HM480640)                    | Meadow soil, basalt bedrock                     | 93             | <i>Ilumatobacter fluminis</i> (AB360343)                      |
| HG379808                                | 1             | 88             | Uncultured actinobacterium (HF584648)                    | White spots from Etruscan tombs mural paintings | 88             | <i>Jiangella muralis</i> (FN645214)                           |
| HG379809                                | 1             | 91             | Uncultured actinobacterium (HF584587)                    | White spots from Etruscan tombs mural paintings | 87             | <i>Jiangella muralis</i> (FN645214)                           |
| HG379810                                | 33            | 99             | Uncultured actinobacterium (HF584587)                    | White spots from Etruscan tombs mural paintings | 95             | <i>Pseudonocardia saturnea</i> (AJ252829)                     |

| Representative clone (accession number) | No. of clones | Similarity (%) | Nearest published relative                               | Source                                   | Similarity (%) | Eztaxon affiliation (accession number)            |
|-----------------------------------------|---------------|----------------|----------------------------------------------------------|------------------------------------------|----------------|---------------------------------------------------|
| HG379811                                | 1             | 94             | Uncultured bacterium (FR871558)                          | Greenhouse soil                          | 83             | <i>Fodinicola feengrottensis</i> (EF490376)       |
| HG379812                                | 1             | 84             | Uncultured bacterium (JF829544)                          | Soil                                     | 83             | <i>Pseudonocardia mongoliensis</i> (AB521676)     |
| <b>Firmicutes</b>                       |               |                |                                                          |                                          |                |                                                   |
| HG379813                                | 1             | 89             | Uncultured bacterium (HE602920)                          | Cave wall biofilm                        | 82             | <i>Clostridium sordelli</i> (AB075771)            |
| HG379814                                | 4             | 96             | Uncultured bacterium (JN616158)                          | Organic ooze from lava tube wall         | 82             | <i>Thermolithobacter ferrireducens</i> (AF282253) |
| <b>Gemmatimonadetes</b>                 |               |                |                                                          |                                          |                |                                                   |
| HG379815                                | 1             | 95             | Uncultured <i>Gemmatimonadales</i> bacterium (EU665102)  | Agricultural soil                        | 81             | <i>Gemmatimonas aurantiaca</i> (AP009153)         |
| HG379816                                | 1             | 99             | Uncultured bacterium (JN672056)                          | White microbial mat from lava tube wall  | 84             | <i>Gemmatimonas aurantiaca</i> (AP009153)         |
| <b>Nitrospirae</b>                      |               |                |                                                          |                                          |                |                                                   |
| HG379817                                | 3             | 94             | Uncultured bacterium (EU287098)                          | Arctic surface sediment                  | 84             | <i>Methylomirabilis oxyfera</i> (FP565575)        |
| HG379818                                | 5             | 99             | Uncultured bacterium (HM445369)                          | White microbial mat from lava tube walls | 95             | <i>Nitrospira moscoviensis</i> (X82558)           |
| HG379819                                | 1             | 99             | Uncultured bacterium (HE653874)                          | Cave                                     | 95             | <i>Nitrospira moscoviensis</i> (X82558)           |
| HG379820                                | 1             | 99             | Uncultured bacterium (HM545202)                          | White microbial mat from lava tube walls | 95             | <i>Nitrospira moscoviensis</i> (X82558)           |
| <b>Planctomycetes</b>                   |               |                |                                                          |                                          |                |                                                   |
| HG379821                                | 1             | 95             | Uncultured <i>Planctomycetales</i> bacterium (JN825597)  | Alkaline lake                            | 80             | <i>Anammoxoglobus propionicus</i> (DQ317601)      |
| HG379822                                | 1             | 98             | Uncultured <i>Planctomycetes</i> bacterium (CU925416)    | Sludge                                   | 87             | <i>Blastopirellula marina</i> (AANZ01000021)      |
| HG379823                                | 1             | 97             | Uncultured <i>Planctomycetales</i> bacterium (JN825608)  | Microbialites from alkaline lake         | 87             | <i>Planctomyces brasiliensis</i> (AEICO1000055)   |
| HG379824                                | 1             | 93             | Uncultured bacterium (FN659098)                          | Host gut <i>Lumbricus terrestris</i>     | 86             | <i>Blastopirellula marina</i> (AANZ01000021)      |
| HG379825                                | 1             | 88             | Uncultured bacterium (EU135128)                          | Soil                                     | 83             | <i>Pirellula staleyii</i> (CP001848)              |
| <b>Alphaproteobacteria</b>              |               |                |                                                          |                                          |                |                                                   |
| HG379826                                | 1             | 99             | Alphaproteobacterium (EF612344)                          | Mine tailings                            | 91             | <i>Rhodobium orientis</i> (D30792)                |
| HG379827                                | 1             | 95             | Uncultured alphaproteobacterium (FN594637)               | Biofilm from gold mine in Zloty Stok     | 89             | <i>Geminicoccus roseus</i> (AM403172)             |
| HG379828                                | 1             | 98             | Uncultured alphaproteobacterium (HE614837)               | Arsenic and gold mine                    | 90             | <i>Geminicoccus roseus</i> (AM403172)             |
| HG379829                                | 1             | 91             | Uncultured <i>Hyphomicrobiaceae</i> bacterium (HQ183835) | Leachate sediment                        | 93             | <i>Hyphomicrobium hollandicum</i> (Y14303)        |
| HG379830                                | 1             | 98             | Uncultured bacterium (JF265753)                          | White microbial mat lava tube wall       | 93             | <i>Filomicrobium fusiforme</i> (Y14313)           |
| HG379831                                | 1             | 97             | Uncultured bacterium (JN606987)                          | White microbial mat from lava tube wall  | 88             | <i>Microvirga aerophila</i> (GQ421848)            |
| HG379832                                | 1             | 98             | Uncultured bacterium (FN659225)                          | Soil                                     | 96             | <i>Rhodoplanes roseus</i> (D25313)                |

| Representative clone (accession number) | No. of clones | Similarity (%) | Nearest published relative                                | Source                                          | Similarity (%) | Eztaxon affiliation (accession number)            |
|-----------------------------------------|---------------|----------------|-----------------------------------------------------------|-------------------------------------------------|----------------|---------------------------------------------------|
| HG379833                                | 1             | 99             | Uncultured bacterium (JN616000)                           | White microbial mat lava tube wall              | 91             | <i>Skermanella aerolata</i> (DQ672568)            |
| <b>Betaproteobacteria</b>               |               |                |                                                           |                                                 |                |                                                   |
| HG379834                                | 8             | 99             | Uncultured betaproteobacterium (EF612412)                 | Soil                                            | 90             | <i>Cupriavidus gilardii</i> (EU024163)            |
| HG379835                                | 2             | 97             | Uncultured betaproteobacterium (EF612412)                 | Soil                                            | 89             | <i>Cupriavidus gilardii</i> (EU024163)            |
| HG379836                                | 1             | 96             | Uncultured betaproteobacterium (EF612412)                 | Soil                                            | 89             | <i>Cupriavidus gilardii</i> (EU024163)            |
| HG379837                                | 1             | 98             | Uncultured <i>Burkholderiales</i> bacterium (EU449561)    | Agricultural soil                               | 89             | <i>Cupriavidus gilardii</i> (EU024163)            |
| HG379838                                | 1             | 98             | Uncultured bacterium (FJ152869)                           | Alkaline saline soil                            | 97             | <i>Piscinibacter aquaticus</i> (DQ664244)         |
| <b>Gammaproteobacteria</b>              |               |                |                                                           |                                                 |                |                                                   |
| HG379839                                | 2             | 97             | Gammaproteobacterium (AB663506)                           | Dechlorinating process                          | 94             | <i>Panacagrimonas perspica</i> (AB257722)         |
| HG379840                                | 1             | 98             | Uncultured gammaproteobacterium (HF584687)                | White spots from Etruscan tombs mural paintings | 88             | <i>Fontimonas thermophila</i> (JN415769)          |
| HG379841                                | 1             | 99             | Uncultured gammaproteobacterium (HF584627)                | White spots from Etruscan tombs mural paintings | 89             | <i>Panacagrimonas perspica</i> (AB257722)         |
| HG379842                                | 1             | 99             | Uncultured gammaproteobacterium (AY922146)                | Farm soil                                       | 95             | <i>Steroidobacter denitrificans</i> (EF605262)    |
| HG379843                                | 2             | 99             | Uncultured gammaproteobacterium (HF584625)                | White spots from Etruscan tombs mural paintings | 98             | <i>Steroidobacter denitrificans</i> (EF605262)    |
| HG379844                                | 1             | 96             | Uncultured bacterium (JN801134)                           | Tan microbial mat from lava tube wall           | 87             | <i>Steroidobacter denitrificans</i> (EF605262)    |
| HG379845                                | 1             | 93             | Uncultured bacterium (EU801093)                           | Delaware Bay, NJ                                | 89             | <i>Steroidobacter denitrificans</i> (EF605262)    |
| HG379846                                | 1             | 94             | Uncultured bacterium (HM187301)                           | Saturated zone of the Hanford Site              | 88             | <i>Steroidobacter denitrificans</i> (EF605262)    |
| <b>Deltaproteobacteria</b>              |               |                |                                                           |                                                 |                |                                                   |
| HG379847                                | 4             | 98             | Uncultured deltaproteobacterium (AM935293)                | Contaminated soil                               | 81             | <i>Desulfohalobium utahense</i> (DQ067421)        |
| HG379848                                | 1             | 94             | Uncultured deltaproteobacterium (FJ535064)                | Cave wall biofilm                               | 81             | <i>Desulfosalsimonas propionica</i> (DQ067422)    |
| HG379849                                | 1             | 99             | Uncultured deltaproteobacterium (HF584635)                | White spots from Etruscan tombs mural paintings | 86             | <i>Desulfacinum hydrothermale</i> (AF170417)      |
| HG379850                                | 1             | 99             | Uncultured <i>Desulfuromonadales</i> bacterium (AM935314) | Contaminated soil                               | 82             | <i>Desulfacinum infernum</i> (L27426)             |
| HG379851                                | 1             | 99             | Uncultured bacterium (JN606997)                           | White microbial mat from lava tube wall         | 84             | <i>Desulfosalsimonas propionica</i> (DQ067422)    |
| HG379852                                | 4             | 99             | Uncultured bacterium (JF265699)                           | White microbial mat lava tube wall              | 84             | <i>Desulfovibrio sulfodismutans</i> (Y17764)      |
| HG379853                                | 1             | 98             | Uncultured bacterium (JN615842)                           | Yellow microbial mat from lava tube wall        | 83             | <i>Desulfopila inferna</i> (AM774321)             |
| HG379854                                | 1             | 98             | Uncultured bacterium (HM558628)                           | Garden                                          | 85             | <i>Geoalkalibacter ferrihydriticus</i> (DQ309326) |
| HG379855                                | 1             | 98             | Uncultured bacterium (JN672401)                           | White microbial mat from lava tube wall         | 88             | <i>Haliangium tepidum</i> (AB062751)              |

| Representative clone (accession number) | No. of clones | Similarity (%) | Nearest published relative      | Source                             | Similarity (%) | Eztaxon affiliation (accession number)          |
|-----------------------------------------|---------------|----------------|---------------------------------|------------------------------------|----------------|-------------------------------------------------|
| HG379856<br>Unclassified bacterium      | 1             | 98             | Uncultured bacterium (JF265710) | White microbial mat lava tube wall | 82             | <i>Hippea jasoniae</i> (FR754498)               |
| HG379857                                | 1             | 97             | Uncultured bacterium (EU133899) | Grass prairie                      | 79             | <i>Aciditerrimonas ferrireducens</i> (AB517669) |

Table S2. Phylogenetic affiliations of the 16S rRNA sequences obtained from the bacteria in the ET2 sample

| Representative clone (accession number) | No. of clones | Similarity (%) | Nearest published relative                                | Source                                    | Similarity (%) | Eztaxon affiliation (accession number)          |
|-----------------------------------------|---------------|----------------|-----------------------------------------------------------|-------------------------------------------|----------------|-------------------------------------------------|
| <b>Acidobacteria</b>                    |               |                |                                                           |                                           |                |                                                 |
| HG379858                                | 1             | 99             | Uncultured <i>Acidobacteria</i> bacterium (DQ139452)      | Roman catacombs                           | 91             | <i>Solibacter usitatus</i> (CP000473)           |
| <b>Actinobacteria</b>                   |               |                |                                                           |                                           |                |                                                 |
| HG379859                                | 7             | 96             | <i>Catelliglobospora koreensis</i> (NR_028758)            | Gold-mine cave                            | 96             | <i>Catelliglobospora koreensis</i> (AF171700)   |
| HG379860                                | 2             | 99             | <i>Jiangella muralis</i> (FN645214)                       | Indoor environment                        | 99             | <i>Jiangella muralis</i> (FN645214)             |
| HG379861                                | 1             | 95             | <i>Jiangella muralis</i> (FN645214)                       | Indoor environment                        | 95             | <i>Jiangella muralis</i> (FN645214)             |
| HG379862                                | 6             | 96             | <i>Streptosporangium</i> sp. (EF216362)                   | Shallow water sediment                    | 97             | <i>Streptosporangium anatoliense</i> (HQ157194) |
| HG379863                                | 1             | 91             | Uncultured actinobacterium (HF584512)                     | White spots from Etruscan mural paintings | 91             | <i>Marmoricola scoriae</i> (FN386750)           |
| HG379864                                | 3             | 99             | Uncultured actinobacterium (HF584605)                     | White spots from Etruscan mural paintings | 96             | <i>Nocardioides salaries</i> (DQ401092)         |
| HG379865                                | 1             | 97             | Uncultured bacterium (EU132756)                           | Soil                                      | 91             | <i>Aciditerrimonas ferrireducens</i> (AB517669) |
| HG379866                                | 1             | 85             | Uncultured bacterium (AM697552)                           | Indoor dust                               | 88             | <i>Saccharopolyspora cebuensis</i> (EF030715)   |
| HG379867                                | 1             | 87             | Uncultured <i>Pseudonocardiaceae</i> bacterium (FM209144) | Contaminated soil                         | 89             | <i>Yuhushiella deserti</i> (FJ526746)           |
| HG379868                                | 1             | 99             | Uncultured <i>Rubrobacter</i> sp. (FN689575)              | Fragment of historical paper              | 99             | <i>Rubrobacter xylanophilus</i> (CP000386)      |
| <b>Bacteroidetes</b>                    |               |                |                                                           |                                           |                |                                                 |
| HG379869                                | 5             | 96             | Uncultured <i>Bacteroidetes</i> bacterium (CU921989)      | Sludge                                    | 94             | <i>Flavitalea gansuensis</i> (GU295962)         |
| <b>Planctomycetes</b>                   |               |                |                                                           |                                           |                |                                                 |
| HG379870                                | 1             | 90             | Uncultured <i>Planctomycetaceae</i> bacterium (FJ543048)  | Gut                                       | 80             | <i>Blastopirellula marina</i> (AANZ01000021)    |
| HG379871                                | 1             | 84             | Uncultured <i>Planctomycetales</i> bacterium (AY360646)   | Oxic rice field soil                      | 86             | <i>Singulisphaera acidiphila</i> (AM850678)     |
| <b>Alphaproteobacteria</b>              |               |                |                                                           |                                           |                |                                                 |
| HG379872                                | 1             | 99             | <i>Phyllobacterium</i> sp. (DQ431466)                     | Soil                                      | 99             | <i>Phyllobacterium trifolii</i> (AY786080)      |
| HG379873                                | 1             | 93             | <i>Phyllobacterium</i> sp. (DQ431466)                     | Soil                                      | 95             | <i>Phyllobacterium trifolii</i> (AY786080)      |
| HG379874                                | 1             | 98             | Alphaproteobacterium (DQ123619)                           | Hospital water network                    | 95             | <i>Rhodoplanes roseus</i> (D25313)              |
| HG379875                                | 1             | 96             | Uncultured alphaproteobacterium (GQ302527)                | Cold spring                               | 94             | <i>Filomicrobium fusiforme</i> (Y14313)         |
| HG379876                                | 2             | 98             | Uncultured alphaproteobacterium (HE614776)                | Arsenic and gold mine                     | 90             | <i>Geminicoccus roseus</i> (AY428766)           |
| HG379877                                | 14            | 99             | Uncultured alphaproteobacterium (GQ302527)                | Cold spring                               | 95             | <i>Pedomicrobium manganicum</i> (X97691)        |

| Representative clone (accession number) | No. of clones | Similarity (%) | Nearest published relative                                | Source                          | Similarity (%) | Eztaxon affiliation (accession number)           |
|-----------------------------------------|---------------|----------------|-----------------------------------------------------------|---------------------------------|----------------|--------------------------------------------------|
| HG379878                                | 1             | 95             | Uncultured alphaproteobacterium (GQ302527)                | Cold spring                     | 92             | <i>Pedomicrobium manganicum</i> (X97691)         |
| HG379879                                | 2             | 95             | Uncultured alphaproteobacterium (GQ302527)                | Cold spring                     | 94             | <i>Phyllobacterium trifolii</i> (AY786080)       |
| HG379880                                | 1             | 97             | Uncultured bacterium (FJ478824)                           | Soil                            | 90             | <i>Dongia mobilis</i> (FJ455532)                 |
| HG379881                                | 1             | 87             | Uncultured bacterium (AM949497)                           | Oxic zone of flooded paddy soil | 87             | <i>Hyphomicrobium aestuarii</i> (Y14304)         |
| HG379882                                | 10            | 94             | Uncultured bacterium (JF166737)                           | Skin                            | 94             | <i>Prosthecomicrobium pneumaticum</i> (AB017203) |
| HG379883                                | 3             | 96             | Uncultured bacterium (JF166737)                           | Skin                            | 94             | <i>Prosthecomicrobium pneumaticum</i> (AB017203) |
| HG379884                                | 1             | 99             | Uncultured bacterium (HQ218506)                           | PAH-contaminated soil           | 98             | <i>Sphingomonas sanxanigenens</i> (DQ789172)     |
| HG379885                                | 1             | 93             | Uncultured <i>Phyllobacteriaceae</i> bacterium (AM936593) | Contaminated soil               | 91             | <i>Prosthecomicrobium pneumaticum</i> (AB017203) |
| HG379886                                | 5             | 99             | Uncultured sludge bacterium (AF234724)                    | Sludge                          | 99             | <i>Hyphomicrobium aestuarii</i> (Y14304)         |
| HG379887                                | 1             | 91             | Uncultured sludge bacterium (AF234703)                    | Sludge                          | 94             | <i>Hyphomicrobium aestuarii</i> (Y14304)         |
| HG379888                                | 1             | 91             | Uncultured <i>Xanthobacter</i> sp. (FJ542975)             | Gut <i>Eisenia foetida</i>      | 92             | <i>Xanthobacter agilis</i> (X94198)              |
| HG379889                                | 2             | 93             | Uncultured <i>Xanthobacter</i> sp. (FJ542975)             | High ergovaline treatment gut   | 94             | <i>Xanthobacter agilis</i> (X94198)              |
| <b>Gammaproteobacteria</b>              |               |                |                                                           |                                 |                |                                                  |
| HG379890                                | 1             | 90             | Uncultured bacterium (HQ385560)                           | Activated sludge                | 90             | <i>Luteimonas aquatica</i> (EF626688)            |
| HG379891                                | 4             | 94             | Uncultured <i>Xanthomonadaceae</i> bacterium (AY360613)   | Oxic rice field soil            | 93             | <i>Lysobacter thermophilus</i> (JQ746036)        |



Table S3. Phylogenetic affiliations of the 16S rRNA sequences obtained from the bacteria in the ET3 sample

| Representative clone (accession number) | No. of clones | Similarity (%) | Nearest published relative                               | Source                                          | Similarity (%) | Eztaxon affiliation (accession number)        |
|-----------------------------------------|---------------|----------------|----------------------------------------------------------|-------------------------------------------------|----------------|-----------------------------------------------|
| <b>Acidobacteria</b>                    |               |                |                                                          |                                                 |                |                                               |
| HG379892                                | 1             | 96             | Uncultured <i>Acidobacteria</i> bacterium (DQ139453)     | Roman catacombs                                 | 84             | <i>Granulicella pectinivorans</i> (AM887757)  |
| HG379893                                | 3             | 99             | Uncultured <i>Acidobacteria</i> bacterium (DQ139452)     | Roman catacombs                                 | 92             | <i>Solibacter usitatus</i> (CP000473)         |
| <b>Actinobacteria</b>                   |               |                |                                                          |                                                 |                |                                               |
| HG379894                                | 11            | 96             | <i>Catelliglobospora koreensis</i> (NR_028758)           | Gold-mine cave                                  | 96             | <i>Catelliglobospora koreensis</i> (AF171700) |
| HG379895                                | 5             | 99             | <i>Jiangella muralis</i> (FN645214)                      | Indoor environment                              | 99             | <i>Jiangella muralis</i> (FN645214)           |
| HG379896                                | 1             | 82             | <i>Jiangella muralis</i> (FN645214)                      | Indoor environment                              | 82             | <i>Jiangella muralis</i> (FN645214)           |
| HG379897                                | 1             | 94             | <i>Jiangella muralis</i> (FN645214)                      | Indoor environment                              | 95             | <i>Jiangella muralis</i> (FN645214)           |
| HG379898                                | 6             | 97             | <i>Streptosporangium</i> sp. (EF216357)                  | Shallow water sediment                          | 97             | <i>Streptosporangium longisporum</i> (X89944) |
| HG379899                                | 5             | 99             | Uncultured actinobacterium (HF584605)                    | White spots from Etruscan tombs mural paintings | 96             | <i>Marmoricola scoriae</i> (FN386750)         |
| HG379900                                | 1             | 94             | Uncultured actinobacterium (HM480664)                    | Soil                                            | 94             | <i>Micromonospora lupine</i> (AJ783996)       |
| HG379901                                | 1             | 96             | Uncultured bacterium (HM295827)                          | Skin                                            | 97             | <i>Nocardia transvalensis</i> (BAGL01000037)  |
| <b>Bacteroidetes</b>                    |               |                |                                                          |                                                 |                |                                               |
| HG379902                                | 1             | 94             | <i>Chitinophaga japonensis</i> (NR_028638)               | Environmental sample                            | 95             | <i>Chitinophaga japonensis</i> (AB078055)     |
| HG379903                                | 5             | 96             | Uncultured <i>Bacteroidetes</i> bacterium (CU921989)     | Sludge                                          | 94             | <i>Flavitalea gansuensis</i> (GU295962)       |
| <b>Planctomycetes</b>                   |               |                |                                                          |                                                 |                |                                               |
| HG379904                                | 1             | 95             | Uncultured <i>Planctomycetaceae</i> bacterium (FJ543047) | Gut                                             | 87             | <i>Blastopirellula marina</i> (AANZ01000021)  |
| HG379905                                | 4             | 96             | Uncultured <i>Planctomycetes</i> (EF188522)              | Altamira Cave                                   | 86             | <i>Gemmata obscuriglobus</i> (ABGO01000325)   |
| HG379906                                | 1             | 97             | Uncultured bacterium (EF516253)                          | Grass land soil                                 | 93             | <i>Singulisphaera rosea</i> (FN391026)        |
| <b>Alphaproteobacteria</b>              |               |                |                                                          |                                                 |                |                                               |
| HG379907                                | 9             | 93             | <i>Xanthobacter</i> sp. (AB636292)                       | Forest soil                                     | 93             | <i>Xanthobacter tagetidis</i> (X99469)        |
| HG379908                                | 1             | 99             | Uncultured alphaproteobacterium (EF612404)               | Soil                                            | 96             | <i>Afipia birgiae</i> (CAJQ01000091)          |
| HG379909                                | 1             | 89             | Uncultured alphaproteobacterium (EF188662)               | Altamira Cave                                   | 90             | <i>Agaricicola taiwanensis</i> (FJ594057)     |
| HG379910                                | 1             | 93             | Uncultured alphaproteobacterium (AY921815)               | Farm soil                                       | 89             | <i>Azospirillum oryzae</i> (AB185396)         |
| HG379911                                | 1             | 86             | Uncultured alphaproteobacterium (CU921531)               | Sludge                                          | 86             | <i>Bauldia consociata</i> (FJ560750)          |

| Representative clone (accession number) | No. of clones | Similarity (%) | Nearest published relative                              | Source                    | Similarity (%) | Eztaxon affiliation (accession number)           |
|-----------------------------------------|---------------|----------------|---------------------------------------------------------|---------------------------|----------------|--------------------------------------------------|
| HG379912                                | 1             | 97             | Uncultured alphaproteobacterium (GQ302527)              | Cold spring               | 96             | <i>Hyphomicrobium aestuarii</i> (Y14304)         |
| HG379913                                | 2             | 99             | Uncultured alphaproteobacterium (EF188462)              | Altamira Cave             | 99             | <i>Phyllobacterium ifriqiyense</i> (AY785325)    |
| HG379914                                | 1             | 95             | Uncultured alphaproteobacterium (GQ302527)              | Cold spring               | 94             | <i>Phyllobacterium ifriqiyense</i> (AY785325)    |
| HG379915                                | 16            | 99             | Uncultured alphaproteobacterium (GQ302527)              | Cold spring               | 95             | <i>Pedomicrobium manganicum</i> X97691)          |
| HG379916                                | 1             | 88             | Uncultured alphaproteobacterium (GQ302527)              | Cold spring               | 85             | <i>Pedomicrobium manganicum</i> (X97691)         |
| HG379917                                | 1             | 93             | Uncultured alphaproteobacterium (CU923974)              | Sludge                    | 91             | <i>Rhodoplanes roseus</i> (D25313)               |
| HG379918                                | 3             | 94             | Uncultured alphaproteobacterium (CU921531)              | Sludge                    | 94             | <i>Xanthobacter autotrophicus</i> (X94201)       |
| HG379919                                | 1             | 97             | Uncultured bacterium (FJ478824)                         | Grass prairie             | 89             | <i>Dongia mobilis</i> (FJ455532)                 |
| HG379920                                | 1             | 84             | Uncultured bacterium (GQ264219)                         | Waste site                | 81             | <i>Filomicrobium insigne</i> (EF117253)          |
| HG379921                                | 11            | 99             | Uncultured bacterium (AY424825)                         | Mobile Cave               | 99             | <i>Hyphomicrobium aestuarii</i> (Y14304)         |
| HG379922                                | 2             | 99             | Uncultured bacterium (JN052226)                         | <i>Citrus</i> rhizosphere | 95             | <i>Hyphomicrobium hollandicum</i> (Y14303)       |
| HG379923                                | 1             | 90             | Uncultured bacterium (AY963442)                         | Soil                      | 86             | <i>Pedomicrobium australicum</i> (X97693)        |
| HG379924                                | 12            | 94             | Uncultured bacterium (JF166737)                         | Skin                      | 93             | <i>Prosthecomicrobium pneumaticum</i> (AB017203) |
| HG379925                                | 2             | 99             | Uncultured bacterium (FJ479056)                         | Tall grass prairie        | 99             | <i>Rhizobium lupini</i> (X87273)                 |
| <b>Gammaproteobacteria</b>              |               |                |                                                         |                           |                |                                                  |
| HG379926                                | 7             | 94             | Uncultured <i>Xanthomonadaceae</i> bacterium (AY360613) | Oxic rice field soil      | 93             | <i>Lysobacter thermophilus</i> (JQ746036)        |
| HG379927                                | 1             | 89             | Uncultured <i>Xanthomonadaceae</i> bacterium (AY360613) | Oxic rice field soil      | 88             | <i>Lysobacter thermophilus</i> (JQ746036)        |
| HG379928                                | 1             | 90             | Uncultured <i>Xanthomonadaceae</i> bacterium (AY360613) | Oxic rice field soil      | 89             | <i>Lysobacter thermophilus</i> (JQ746036)        |
| HG379929                                | 1             | 87             | Uncultured bacterium (AB672310)                         | Rice paddy field soil     | 86             | <i>Silanimonas mangrovi</i> (HE573756)           |
| <b>Unclassified bacterium</b>           |               |                |                                                         |                           |                |                                                  |
| HG379930                                | 1             | 80             | Alphaproteobacterium (DQ123619)                         | Water network             | 78             | <i>Rhodoplanes piscinae</i> (AM712913)           |

Table S4. Phylogenetic affiliations of the 16S rRNA sequences obtained from the bacteria in the ET5 sample

| Representative clone (accession number) | No. of clones | Similarity (%) | Nearest published relative                                | Source                                    | Similarity (%) | Eztaxon affiliation (accession number)                        |
|-----------------------------------------|---------------|----------------|-----------------------------------------------------------|-------------------------------------------|----------------|---------------------------------------------------------------|
| <b>Acidobacteria</b>                    |               |                |                                                           |                                           |                |                                                               |
| HG379931                                | 2             | 94             | Uncultured Acidobacteria bacterium (JN037860)             | Saline-alkaline soil                      | 83             | <i>Candidatus Chloracidobacterium thermophilus</i> (CP002514) |
| <b>Actinobacteria</b>                   |               |                |                                                           |                                           |                |                                                               |
| HG379932                                | 1             | 97             | <i>Catelliglobospora koreensis</i> (NR_028758)            | Gold-mine cave                            | 98             | <i>Catelliglobospora koreensis</i> (AF171700)                 |
| HG379933                                | 1             | 98             | <i>Kribbella antibiotica</i> (NR_029048)                  | Soil                                      | 99             | <i>Kribbella antibiotica</i> (AY082063)                       |
| HG379934                                | 1             | 92             | <i>Kribbella antibiotica</i> (NR_029048)                  | Soil                                      | 92             | <i>Kribbella antibiotica</i> (AY082063)                       |
| HG379935                                | 2             | 99             | Uncultured actinobacterium (HF584605)                     | White spots from Etruscan mural paintings | 95             | <i>Nocardioides salaries</i> (DQ401092)                       |
| HG379936                                | 2             | 96             | Uncultured bacterium (FJ479385)                           | Grass prairie                             | 91             | <i>Aciditerrimonas ferrireducens</i> (JN033775)               |
| HG379937                                | 1             | 97             | Uncultured bacterium (FJ479385)                           | Undisturbed tall grass prairie            | 91             | <i>Iamia majanohamensis</i> (JN033775)                        |
| HG379938                                | 3             | 95             | Uncultured bacterium (HM557659)                           | Fungus garden                             | 99             | <i>Jiangella muralis</i> (FN645214)                           |
| HG379939                                | 1             | 95             | Uncultured bacterium (HM295827)                           | Skin                                      | 95             | <i>Nocardia transvalensis</i> (BAGL01000037)                  |
| HG379940                                | 4             | 96             | Uncultured soil bacterium (DQ643735)                      | Agricultural soil                         | 96             | <i>Streptosporangium anatoliense</i> (HQ157194)               |
| <b>Bacteroidetes</b>                    |               |                |                                                           |                                           |                |                                                               |
| HG379941                                | 1             | 99             | <i>Chitinophaga niabensis</i> (NR_044559)                 | Soil                                      | 99             | <i>Chitinophaga niabensis</i> (EU714259)                      |
| <b>Planctomycetes</b>                   |               |                |                                                           |                                           |                |                                                               |
| HG379942                                | 1             | 90             | <i>Isosphaera pallida</i> (NR_074534)                     | Algal mat from Kah-nee-tah hot spring     | 90             | <i>Isosphaera pallida</i> (CP002353)                          |
| HG379943                                | 2             | 97             | <i>Singulisphaera acidiphila</i> (AM902527)               | <i>Sphagnum</i> peat bog                  | 97             | <i>Singulisphaera acidiphila</i> (AM850678)                   |
| HG379944                                | 2             | 96             | Uncultured <i>Planctomycetes</i> (EF188522)               | Altamira Cave                             | 86             | <i>Zavarzinella formosa</i> (AM162406)                        |
| HG379945                                | 1             | 99             | Uncultured sludge bacterium (AF234736)                    | Sludge                                    | 85             | <i>Pirellula staleyi</i> (CP001848)                           |
| <b>Alphaproteobacteria</b>              |               |                |                                                           |                                           |                |                                                               |
| HG379946                                | 1             | 93             | <i>Xanthobacter</i> sp. (AB636292)                        | Forest soil                               | 94             | <i>Xanthobacter tagetidis</i> (X99469)                        |
| HG379947                                | 1             | 99             | Uncultured <i>Hyphomicrobium</i> sp. (AM935308)           | Hydrocarbon-contaminated soil             | 96             | <i>Hyphomicrobium denitrificans</i> (ACVL01000012)            |
| HG379948                                | 1             | 98             | Alphaproteobacterium (DQ123619)                           | Hospital water network                    | 93             | <i>Rhodoplanes roseus</i> (D25313)                            |
| HG379949                                | 1             | 95             | Uncultured <i>Hyphomicrobiaceae</i> bacterium (EU266918)  | Tar-oil contaminated aquifer sediments    | 92             | <i>Filomicrobium fusiforme</i> (Y14313)                       |
| HG379950                                | 1             | 98             | Uncultured <i>Phyllobacteriaceae</i> bacterium (EF019808) | Trembling aspen rhizosphere               | 94             | <i>Mesorhizobium chacoense</i> (AJ278249)                     |

| Representative clone (accession number) | No. of clones | Similarity (%) | Nearest published relative                               | Source                                    | Similarity (%) | Eztaxon affiliation (accession number)           |
|-----------------------------------------|---------------|----------------|----------------------------------------------------------|-------------------------------------------|----------------|--------------------------------------------------|
| HG379951                                | 2             | 94             | Uncultured <i>Rhizobiales</i> bacterium (AM936561)       | Contaminated soil                         | 91             | <i>Prosthecomicrobium pneumaticum</i> (AB017203) |
| HG379952                                | 1             | 99             | Uncultured <i>Sphingomonadaceae</i> bacterium (EF019685) | Trembling aspen rhizosphere               | 96             | <i>Sphingomonas sediminicola</i> (AB258386)      |
| HG379953                                | 2             | 99             | Uncultured alphaproteobacterium (FJ535080)               | Cave wall biofilm                         | 89             | <i>Hyphomicrobium hollandicum</i> (IFAMKB-677)   |
| HG379954                                | 1             | 99             | Uncultured alphaproteobacterium (HF584615)               | White spots from Etruscan mural paintings | 88             | <i>Paracoccus rhizosphaerae</i> (JN662389)       |
| HG379955                                | 3             | 98             | Uncultured alphaproteobacterium (GQ302527)               | Cold spring                               | 94             | <i>Pedomicrobium manganicum</i> (X97691)         |
| HG379956                                | 5             | 99             | Uncultured alphaproteobacterium (GQ302527)               | Cold spring                               | 95             | <i>Pedomicrobium manganicum</i> (X97691)         |
| HG379957                                | 1             | 99             | Uncultured alphaproteobacterium (GQ302524)               | Cold spring                               | 95             | <i>Pseudolabrys taiwanensis</i> (DQ062742)       |
| HG379958                                | 1             | 99             | Uncultured bacterium (JN850318)                          | Yellow microbial mat from lava tube wall  | 89             | <i>Dongia mobilis</i> (FJ455532)                 |
| HG379959                                | 26            | 98             | Uncultured bacterium (AY424825)                          | Movile Cave                               | 99             | <i>Hyphomicrobium aestuarii</i> (Y14304)         |
| HG379960                                | 1             | 98             | Uncultured bacterium (AY424825)                          | Movile Cave                               | 98             | <i>Hyphomicrobium aestuarii</i> (Y14304)         |
| HG379961                                | 1             | 86             | Uncultured bacterium (AY424825)                          | Movile Cave                               | 86             | <i>Hyphomicrobium zavarzinii</i> (Y14305)        |
| HG379962                                | 1             | 93             | Uncultured bacterium (AB280306)                          | Methane-consuming sludge                  | 93             | <i>Hyphomicrobium zavarzinii</i> (Y14305)        |
| HG379963                                | 1             | 90             | Uncultured bacterium (AY424825)                          | Movile Cave                               | 88             | <i>Hyphomicrobium zavarzinii</i> (Y14305)        |
| HG379964                                | 1             | 99             | Uncultured bacterium (DQ304805)                          | Root from <i>Lasiurus sindicus</i>        | 97             | <i>Inquilingus ginsengisoli</i> (AB245352)       |
| HG379965                                | 1             | 96             | Uncultured sludge bacterium (AF234724)                   | Sludge                                    | 93             | <i>Hyphomicrobium aestuarii</i> (Y14304)         |
| <b>Betaproteobacteria</b>               |               |                |                                                          |                                           |                |                                                  |
| HG379966                                | 1             | 99             | <i>Achromobacter</i> sp. (HE613446)                      | Humans                                    | 95             | <i>Achromobacter spanius</i> (AY170848)          |
| <b>Gammaproteobacteria</b>              |               |                |                                                          |                                           |                |                                                  |
| HG379967                                | 1             | 99             | <i>Pseudomonas alcaligenes</i> (AY835998)                | Marine                                    | 99             | <i>Pseudomonas alcaligenes</i> (Z76653)          |
| HG379968                                | 2             | 95             | Uncultured <i>Xanthomonadaceae</i> bacterium (AY360613)  | Oxic rice field soil                      | 93             | <i>Lysobacter thermophilus</i> (JQ746036)        |
| HG379969                                | 20            | 94             | Uncultured <i>Xanthomonadaceae</i> bacterium (AY360613)  | Oxic rice field soil                      | 93             | <i>Lysobacter thermophilus</i> (JQ746036)        |
| HG379970                                | 3             | 94             | Uncultured <i>Xanthomonadaceae</i> bacterium (AY360613)  | Oxic rice field soil                      | 93             | <i>Lysobacter thermophilus</i> (JQ746036)        |
| HG379971                                | 1             | 94             | Uncultured <i>Xanthomonadaceae</i> bacterium (AY360613)  | Oxid rice field soil                      | 91             | <i>Lysobacter thermophilus</i> (JQ746036)        |
| <b>Deltaproteobacteria</b>              |               |                |                                                          |                                           |                |                                                  |
| HG379972                                | 1             | 99             | Uncultured bacterium (GQ263899)                          | Waste site                                | 86             | <i>Desulfuromonas thiophila</i> (Y11560)         |

Table S5. Phylogenetic affiliations of the 16S rRNA sequences obtained from the potentially active bacteria in the ET3 sample

| Representative clone (accession number) | No. of clones | Similarity (%) | Nearest published relative                           | Source                                          | Similarity (%) | Eztaxon affiliation (accession number)                        |
|-----------------------------------------|---------------|----------------|------------------------------------------------------|-------------------------------------------------|----------------|---------------------------------------------------------------|
| <b>Acidobacteria</b>                    |               |                |                                                      |                                                 |                |                                                               |
| HG379973                                | 1             | 93             | Uncultured <i>Acidobacteria</i> bacterium (HF584585) | White spots from Etruscan tombs mural paintings | 83             | <i>Candidatus</i> Chloracidobacterium thermophilum (CP002514) |
| <b>Actinobacteria</b>                   |               |                |                                                      |                                                 |                |                                                               |
| HG379974                                | 1             | 96             | <i>Catelliglobospora koreensis</i> (NR_028758)       | Gold-mine cave                                  | 96             | <i>Catelliglobospora koreensis</i> (AF171700)                 |
| HG379975                                | 1             | 95             | <i>Catelliglobospora koreensis</i> (NR_028758)       | Gold-mine cave                                  | 92             | <i>Catelliglobospora koreensis</i> (AF171700)                 |
| HG379976                                | 4             | 98             | <i>Jiangella muralis</i> (FN645214)                  | Wall material of an indoor environment          | 99             | <i>Jiangella muralis</i> (FN645214)                           |
| HG379977                                | 3             | 95             | <i>Streptosporangium</i> sp. (GQ924528)              | Vegetable garden soil                           | 96             | <i>Streptosporangium oxazolinicum</i> (AB594818)              |
| HG379978                                | 4             | 97             | <i>Streptosporangium</i> sp. (EF216357)              | Shallow water sediment                          | 97             | <i>Streptosporangium longisporum</i> (X89944)                 |
| HG379979                                | 6             | 99             | Uncultured actinobacterium (HF584605)                | White spots from Etruscan tombs mural paintings | 95             | <i>Marmoricola scoriae</i> (FN386750)                         |
| HG379980                                | 1             | 98             | Uncultured actinobacterium (HF584605)                | White spots from Etruscan tombs mural paintings | 91             | <i>Nocardioides fonticola</i> (EF626689)                      |
| HG379981                                | 1             | 99             | Uncultured actinobacterium (HF584644)                | White spots from Etruscan tombs mural paintings | 99             | <i>Rubrobacter xylanophilus</i> (CP000386)                    |
| HG379982                                | 2             | 97             | Uncultured bacterium (FJ479385)                      | Undisturbed tall grass prairie                  | 89             | <i>Iamia majanohamensis</i> (AB360448)                        |
| HG379983                                | 1             | 99             | Uncultured bacterium (HM297992)                      | Skin                                            | 98             | <i>Janibacter anophelis</i> (AY837752)                        |
| HG379984                                | 1             | 99             | Uncultured bacterium (GQ091279)                      | Skin                                            | 95             | <i>Propionibacterium acnes</i> (AE017283)                     |
| <b>Bacteroidetes</b>                    |               |                |                                                      |                                                 |                |                                                               |
| HG379985                                | 1             | 95             | Uncultured bacterium (JN367229)                      | Soil                                            | 90             | <i>Adhaeribacter terreus</i> (EU682684)                       |
| HG379986                                | 1             | 97             | Uncultured bacterium (HM186161)                      | Hanford Site 300 Area Surface                   | 95             | <i>Chitinophaga niabensis</i> (EU714259)                      |
| HG379987                                | 3             | 96             | Uncultured <i>Bacteroidetes</i> bacterium (CU921989) | Wastewater sludge                               | 94             | <i>Flavitalea gansuensis</i> (GU295962)                       |
| <b>Firmicutes</b>                       |               |                |                                                      |                                                 |                |                                                               |
| HG379988                                | 1             | 98             | <i>Lactobacillus crispatus</i> (NR_074986)           | Ephitelial cells                                | 99             | <i>Lactobacillus crispatus</i> (Y17362)                       |
| <b>Alphaproteobacteria</b>              |               |                |                                                      |                                                 |                |                                                               |
| HG379989                                | 3             | 99             | <i>Hyphomicrobium aestuarii</i> (Y14304)             | Brackish water, Elbe river                      | 99             | <i>Hyphomicrobium aestuarii</i> (Y14304)                      |
| HG379990                                | 1             | 99             | <i>Hyphomicrobium aestuarii</i> (Y14304)             | Brackish water, Elbe river                      | 97             | <i>Hyphomicrobium aestuarii</i> (Y14304)                      |
| HG379991                                | 7             | 99             | <i>Hyphomicrobium zavarzinii</i> (Y14306)            | Peaty and moist soil                            | 99             | <i>Hyphomicrobium zavarzinii</i> (Y14306)                     |
| HG379992                                | 1             | 96             | <i>Hyphomicrobium zavarzinii</i> (Y14306)            | Peaty and moist soil                            | 93             | <i>Hyphomicrobium zavarzinii</i> (Y14306)                     |

| Representative clone (accession number) | No. of clones | Similarity (%) | Nearest published relative                                | Source                                          | Similarity (%) | Eztaxon affiliation (accession number)               |
|-----------------------------------------|---------------|----------------|-----------------------------------------------------------|-------------------------------------------------|----------------|------------------------------------------------------|
| HG379993                                | 1             | 97             | Uncultured bacterium (JX271904)                           | Seed sludge                                     | 89             | <i>Hyphomicrobium zavarzinii</i> (Y14305)            |
| HG379994                                | 1             | 98             | <i>Inquilingus ginsengisoli</i> (GU201848)                | Nodules of the <i>Sphaerophysa salsula</i>      | 99             | <i>Inquilingus ginsengisoli</i> (AB245352)           |
| HG379995                                | 1             | 99             | <i>Paracoccus</i> sp. (EU418724)                          | Endophytic bacteria from copper-tolerant plants | 98             | <i>Paracoccus aminovorans</i> (D32240)               |
| HG379996                                | 2             | 98             | <i>Sphingomonas sanxanigenens</i> (NR_043962)             | Soil                                            | 98             | <i>Sphingomonas sanxanigenens</i> (DQ789172)         |
| HG379997                                | 1             | 99             | <i>Sphingomonas</i> sp. (EU337119)                        | Cattle milk                                     | 98             | <i>Sphingomonas alpine</i> (GQ161989)                |
| HG379998                                | 1             | 85             | Uncultured alphaproteobacterium (CU921531)                | Wastewater sludge                               | 83             | <i>Blastochloris sulfovirdis</i> (D86514)            |
| HG379999                                | 1             | 95             | Uncultured alphaproteobacterium (HF584671)                | White spots from Etruscan tombs mural paintings | 89             | <i>Dongia mobilis</i> (FJ455532)                     |
| HG380000                                | 1             | 99             | Uncultured alphaproteobacterium (HF584663)                | White spots from Etruscan tombs mural paintings | 99             | <i>Sphingomonas echinoides</i> (JH584237)            |
| HG380001                                | 1             | 98             | Uncultured alphaproteobacterium (JN020189)                | Chernobyl concrete microbial biofilm            | 96             | <i>Sphingomonas rubra</i> (FJ834325)                 |
| HG380002                                | 1             | 94             | Uncultured bacterium (JF166737)                           | Skin                                            | 93             | <i>Amorphus coralli</i> (DQ097300)                   |
| HG380003                                | 1             | 93             | Uncultured bacterium (JF166737)                           | Skin                                            | 88             | <i>Amorphus orientalis</i> (FJ998414)                |
| HG380004                                | 1             | 92             | Uncultured bacterium (EU133367)                           | Soil                                            | 86             | <i>Azospirillum halopraeferens</i> (Z29618)          |
| HG380005                                | 1             | 99             | Uncultured bacterium (DQ088788)                           | Crustal biotome                                 | 95             | <i>Filomicrobium fusiforme</i> (Y14313)              |
| HG380006                                | 1             | 99             | Uncultured bacterium (JX271904)                           | Seed sludge                                     | 94             | <i>Hyphomicrobium zavarzinii</i> (Y14305)            |
| HG380007                                | 1             | 96             | Uncultured bacterium (GQ264456)                           | Simulated low level waste site                  | 96             | <i>Hyphomicrobium aestuarii</i> (Y14304)             |
| HG380008                                | 1             | 97             | Uncultured bacterium (JX271904)                           | Seed sludge                                     | 92             | <i>Hyphomicrobium zavarzinii</i> (Y14306)            |
| HG380009                                | 1             | 99             | Uncultured bacterium (GQ264219)                           | Simulated low level waste site                  | 96             | <i>Pedomicrobium manganicum</i> (X97691)             |
| HG380010                                | 1             | 98             | Uncultured bacterium (HM331997)                           | Skin                                            | 96             | <i>Sphingomonas jaspsi</i> (AB264131)                |
| HG380011                                | 1             | 99             | Uncultured <i>Bradyrhizobium</i> sp. (FJ193014)           | Spacecraft assembly clean room                  | 98             | <i>Afipia massiliensis</i> (AY029562)                |
| HG380012                                | 2             | 93             | Uncultured <i>Phyllobacteriaceae</i> bacterium (AM936593) | Contaminated soil                               | 90             | <i>Amorphus orientalis</i> (FJ998414)                |
| HG380013                                | 3             | 98             | Uncultured <i>Phyllobacteriaceae</i> bacterium (EF019808) | Trembling aspen rhizosphere                     | 97             | <i>Mesorhizobium robiniae</i> (EU849582)             |
| HG380014                                | 30            | 94             | Uncultured <i>Phyllobacteriaceae</i> bacterium (AM936593) | Contaminated soil                               | 93             | <i>Prosthecomicrobium pneumaticum</i> (AB017203)     |
| HG380015                                | 1             | 96             | Uncultured soil bacterium (DQ643686)                      | Agricultural soil                               | 89             | <i>Candidatus Alysiosphaera europaea</i> (AY4287566) |
| HG380016                                | 10            | 93             | Uncultured <i>Xanthobacter</i> sp. (HE575387)             | Reverse osmosis membrana                        | 93             | <i>Xanthobacter tagetidis</i> (X99469)               |

| Representative clone (accession number) | No. of clones | Similarity (%) | Nearest published relative                              | Source                   | Similarity (%) | Eztaxon affiliation (accession number)      |
|-----------------------------------------|---------------|----------------|---------------------------------------------------------|--------------------------|----------------|---------------------------------------------|
| <b>Gammaproteobacteria</b>              |               |                |                                                         |                          |                |                                             |
| HG380017                                | 1             | 99             | Uncultured bacterium (JX105534)                         | Ornamental fish aquarium | 91             | <i>Aeromonas taiwanensis</i> (FJ320077)     |
| HG380018                                | 1             | 99             | Uncultured bacterium (JN832961)                         | Seawater from coral reef | 99             | <i>Acinetobacter lwoffii</i> (AIEL01000120) |
| HG380019                                | 1             | 97             | Uncultured <i>Luteimonas</i> sp. (FJ609383)             | River sediment           | 97             | <i>Luteimonas cucumeris</i> (HQ874629)      |
| HG380020                                | 2             | 94             | Uncultured <i>Xanthomonadaceae</i> bacterium (AY360613) | Oxic rice field soil     | 92             | <i>Dokdonella fugitiva</i> (AJ969432)       |
